# Supplementary material
Source: PubMed Central journal article supplement (PMC5237430)
Supplement: NIHMS836928-supplement-supplement_1.pdf [file NIHMS836928-supplement-supplement_1.pdf]

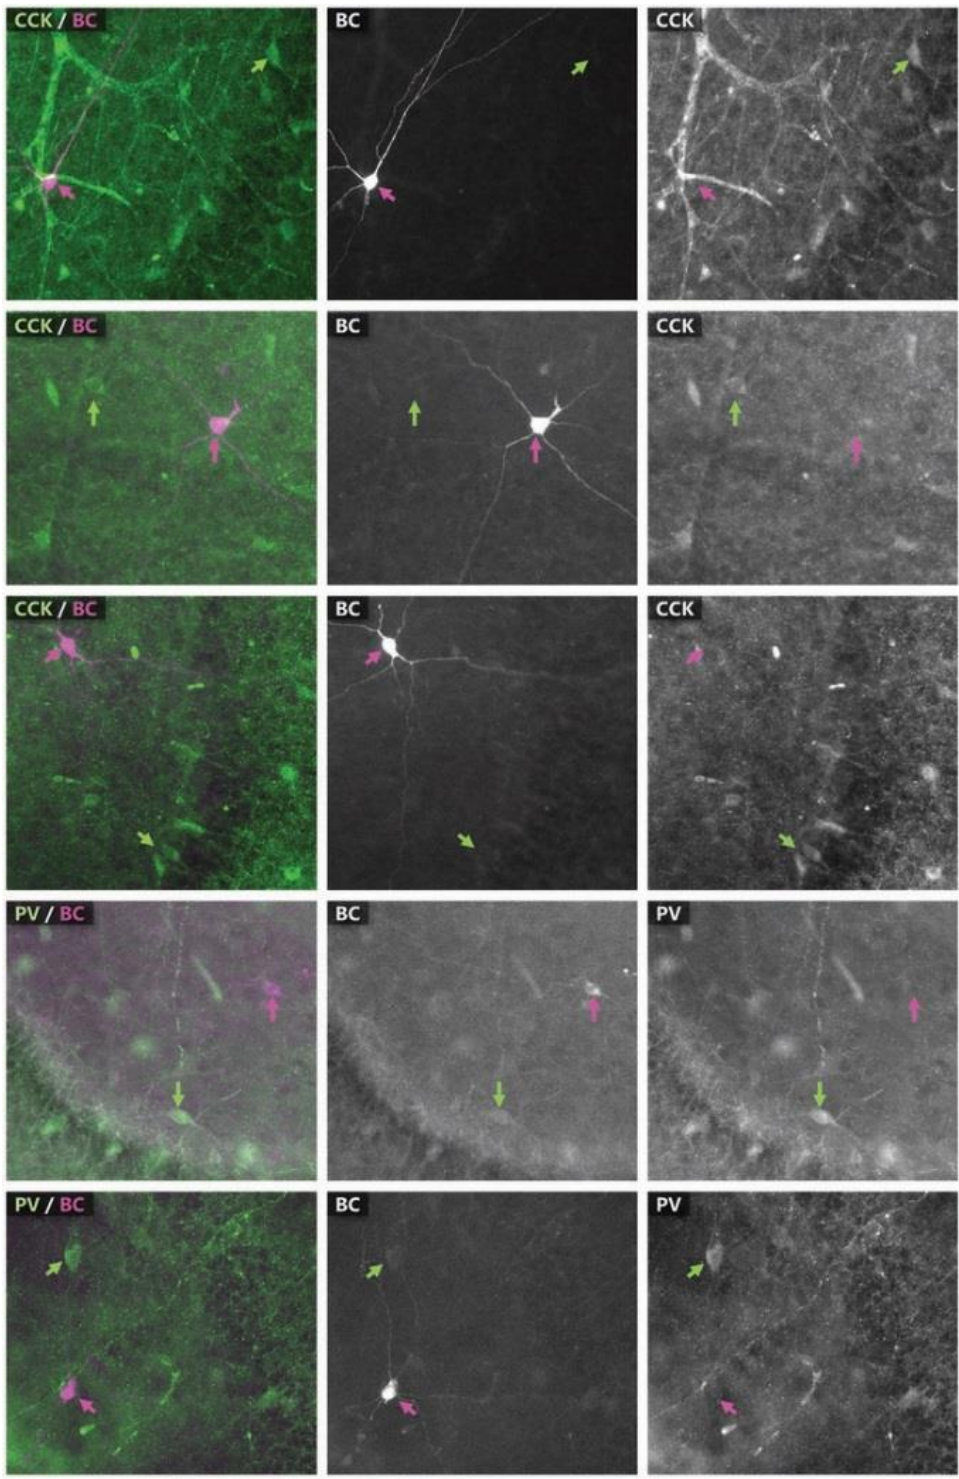

**Supplemental Figure S1:**

Immunohistochemical characterization of biocytin-filled TGOT-responsive fast-spiking hilar interneurons. Green: CCK immunoreactivity; Magenta: biocytin (BC) labeling. Magenta arrows point to TGOT responsive hilar interneurons which in all cases were not immunoreactive for PV or CCK. Green arrows indicate immunoreactive neurons for comparison.
